# Supplementary material for: The strawberry transcription factor FaRAV1 positively regulates anthocyanin accumulation by activation of FaMYB10 and anthocyanin pathway genes
Source: PubMed Central journal article supplement (PMC7589338; doi:10.1111/pbi.13382), 2020-04-13
Supplement: PBI-18-2267-s001.pdf [file PBI-18-2267-s001.pdf]

1 **FaRAV1 positively regulates anthocyanin accumulation**  
 2 **Supplemental Data**

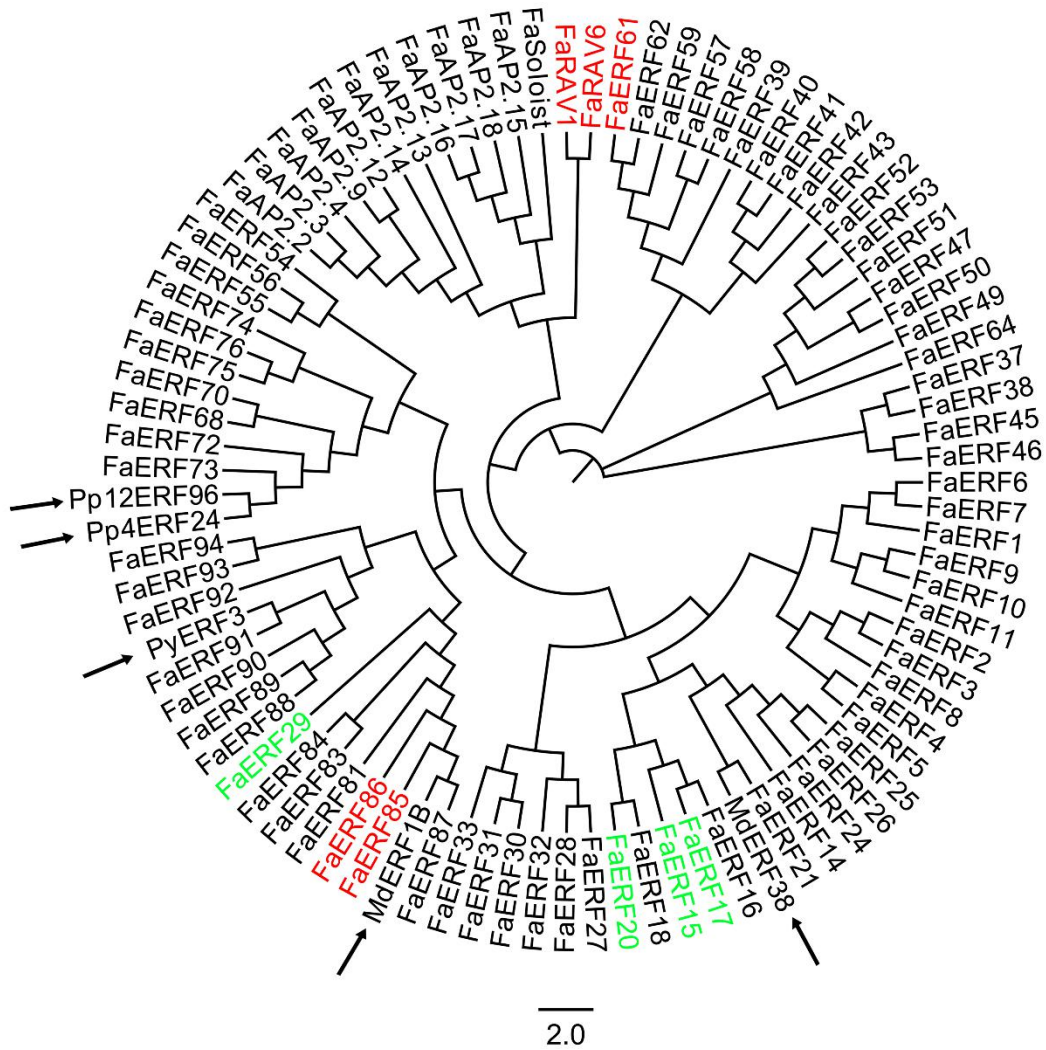

3  
 4 **Supplemental Figure S1.** Phylogenetic tree analysis of strawberry AP2/ERF proteins  
 5 and related AP2/ERF TFs from apple and pear. Those ERFs that activated *FaMYB10*  
 6 promoter are denoted in red, which repressed *FaMYB10* promoter are denoted in  
 7 green. Arrows indicated that the five ERFs which have been characterized in  
 8 anthocyanin biosynthesis in apple and pear. NCBI accession numbers of related  
 9 AP2/ERF TFs in apple and pear are as follows: MdERF1B (XM\_008342898.2),  
 10 MdERF38 (XM\_029104540.1), PyERF3 (MF489220), Pp4ERF24 (XM\_009335420.2)  
 11 and Pp12ERF96 (XM\_009370895.2).  
 12

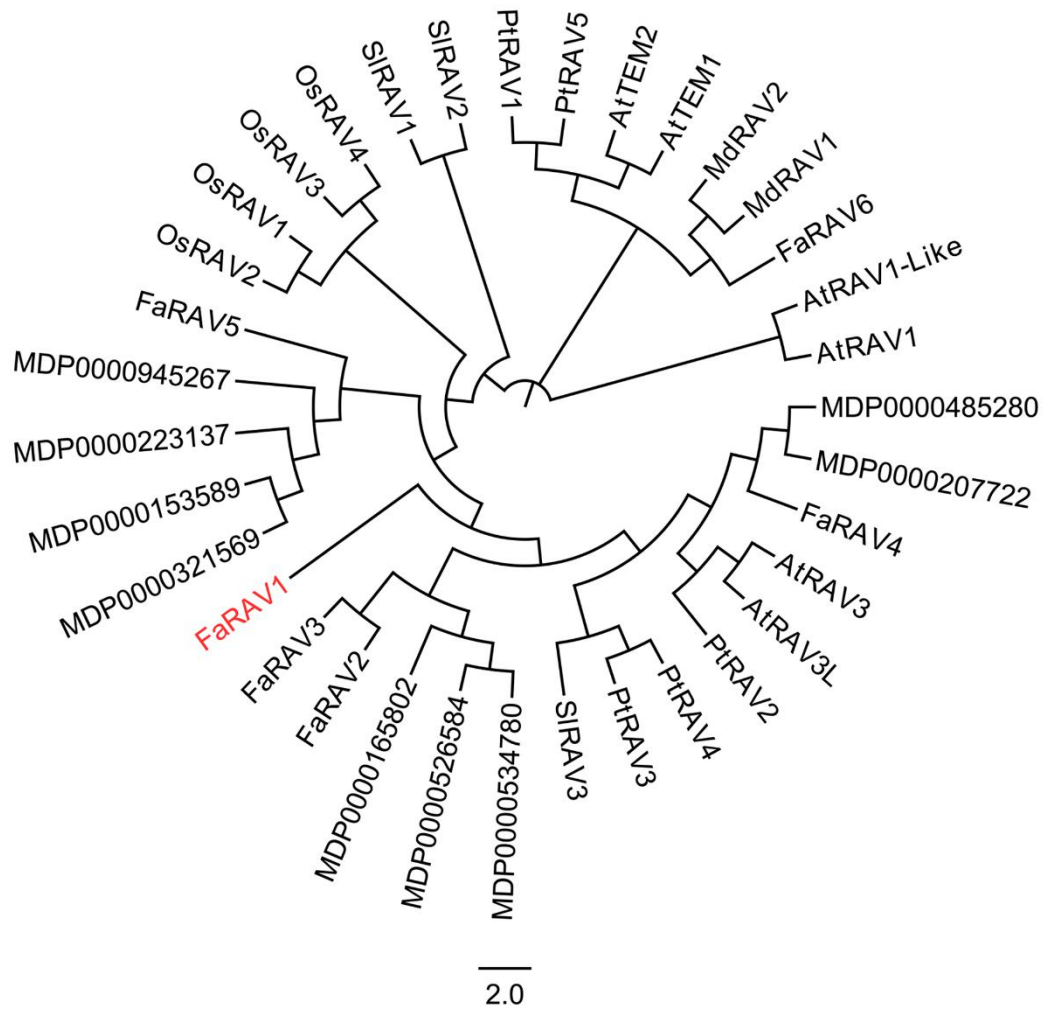

13

14 **Supplemental Figure S2.** Phylogenetic analysis of FaRAV1 and 34 other RAV  
 15 proteins. All the sequences were obtained from the NCBI database. FaRAV1 is  
 16 denoted in red. NCBI accession numbers: *Fragaria × ananassa* FaRAV1  
 17 (XM\_011466945.1), FaRAV2 (XM\_004309888.2), FaRAV3 (XM\_004301388.2),  
 18 FaRAV4 (XM\_004296255.2), FaRAV5 (XM\_011469524.1), FaRAV6  
 19 (XM\_004297092.2), *Arabidopsis thaliana* AtRAV1 (At1g13260), AtRAV1-like  
 20 (At3g25730), AtTEM1 (At1g25560), AtTEM2 (At1g68840), AtRAV3 (At1g50680),  
 21 AtRAV3L (At1g51120), *Solanum lycopersicum* SIRAV1 (XM\_004236951.3),  
 22 SIRAV2 (XM\_001320461.1), SIRAV3 (XM\_010319814.1), *Malus × domestica*  
 23 MdRAV1 (MDP0000939633), MdRAV2 (MDP0000128924), MDP0000945267,  
 24 MDP0000321569, MDP0000223137, MDP0000153589, MDP0000165802,  
 25 MDP0000534780, MDP0000526584, MDP0000485280, MDP0000207722, *Oryza*  
 26 *sativa* OsRAV1 (Os01g04800.1), OsRAV2 (Os01g04750.1), OsRAV3

27 (Os05g47650.1), OsRAV4 (Os01g49830.1), *Populus trichocarpa* PtRAV1  
28 (XP\_002315958.2), PtRAV2 (XP\_002304025.1), PtRAV3 (XP\_024446356.1),  
29 PtRAV4 (XP\_024458800.1), PtRAV5 (XP\_002311438.2).

30

31

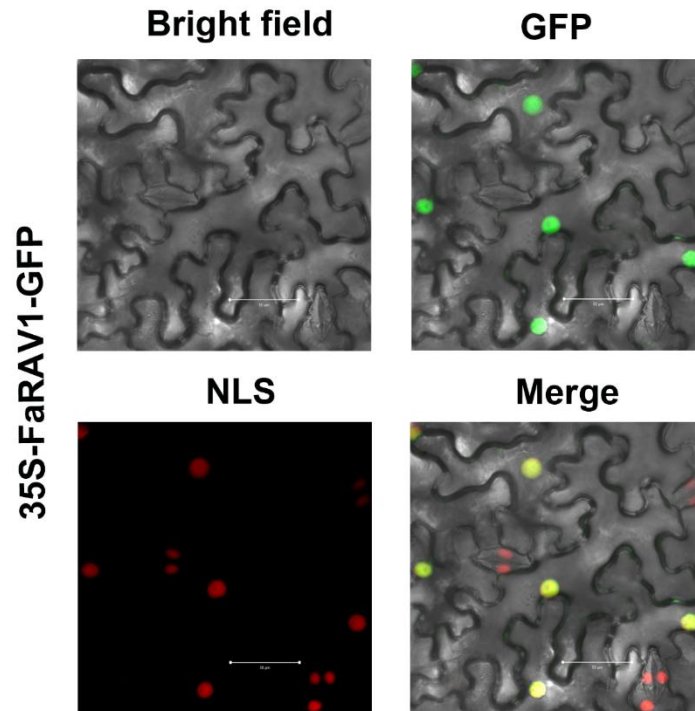

32

33 **Supplemental Figure S3.** Subcellular localization of FaRAV1. *FaRAV1* was inserted  
34 into the pCAMBIA1300-sGFP vector and transiently expressed in tobacco leaves. The  
35 GFP fluorescence indicated the localization of *FaRAV1*. The tobacco was stably  
36 transformed with a specific nucleus-localized red fluorescent protein, mCherry and  
37 the red fluorescence indicated the nucleus-localized signal (NLS). Bars = 50  $\mu\text{m}$ .

38

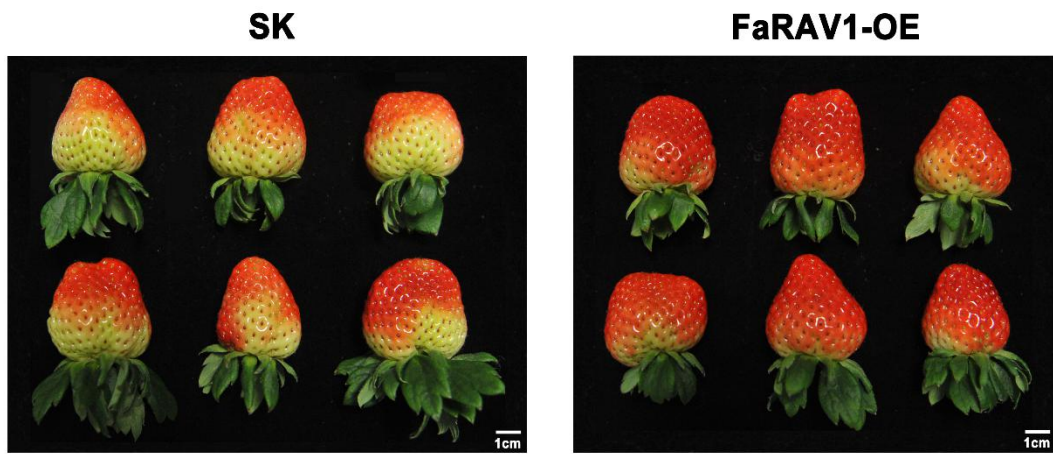

39

40 **Supplemental Figure S4.** The appearance of *FaRAV1* overexpression fruit (right) 9 d  
41 after injection, compared to the control (left).

42

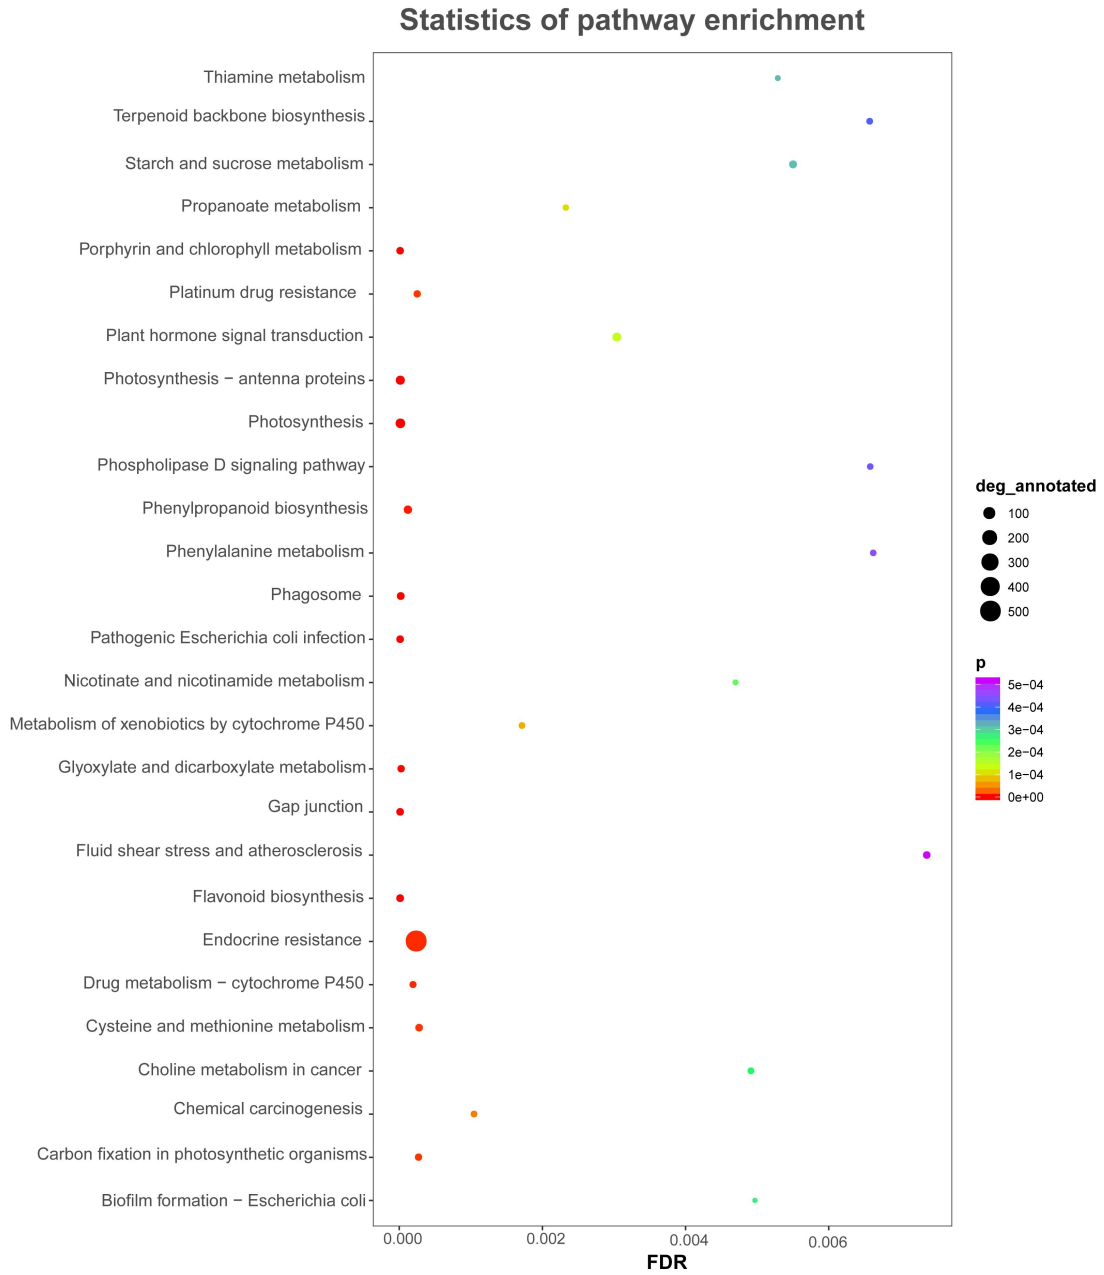

43

44 **Figure S5.** PEGG analysis of DEGs between *FaRAVI* OE fruit and control fruit.

45

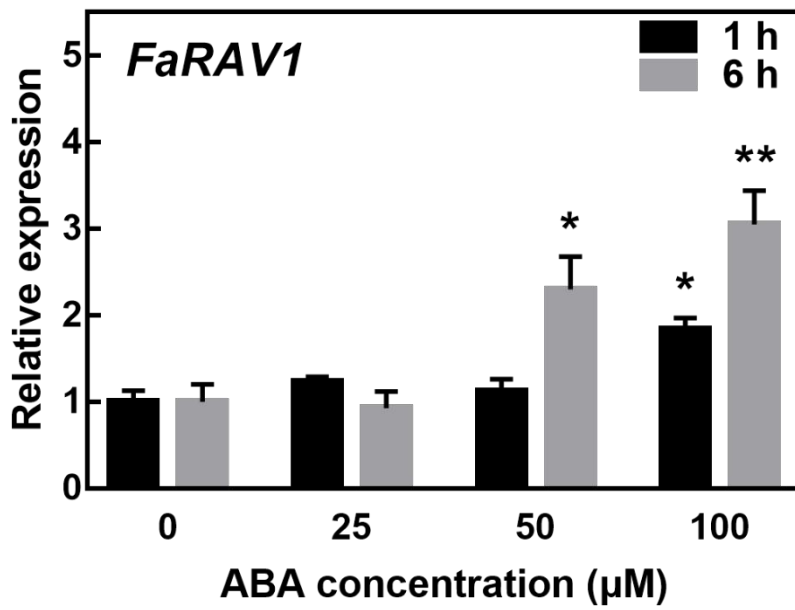

46

47 **Supplemental Figure S6.** RT-qPCR analysis of *FaRAV1* expression in response to  
 48 ABA treatment in strawberry fruit. Detached fruit slices at the green stage were  
 49 treated with different concentrations of ABA for 1 or 6 h and then *FaRAV1* expression  
 50 was tested. Error bars are the SE of three biological replicates. Asterisks denote  
 51 significant differences using Student's t test, \* $P < 0.05$ , \*\* $P < 0.01$ .

52

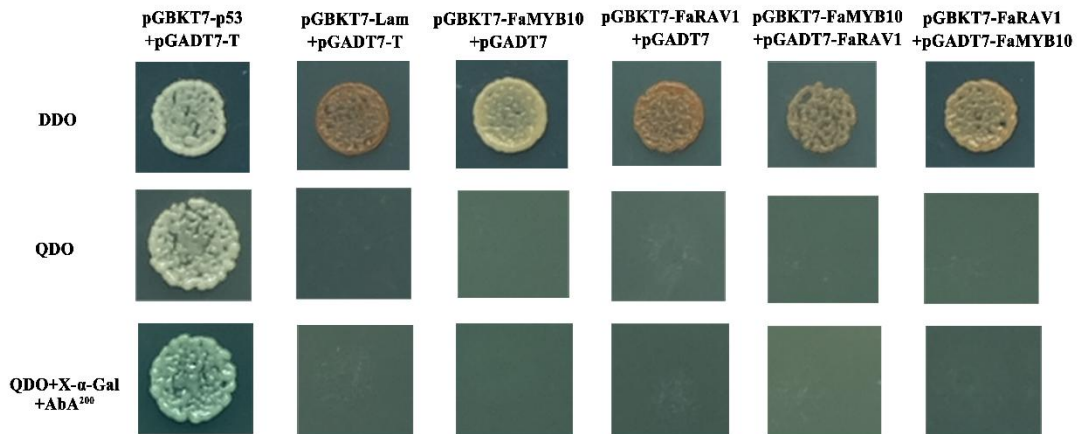

54

55 **Supplemental Figure S7.** Yeast two-hybrid analysis of the interactions between  
 56 FaRAV1 and FaMYB10. FaRAV1 and FaMYB10 were separately fused into  
 57 pGADT7 and pGBKT7 vectors. pGBKT7-p53 and pGBKT7-T were used as positive  
 58 control, while pGBKT7-Lam and pGBKT7-T were used as negative control.  
 59 Protein-protein interactions were detected on SD medium lacking Leu, Trp, His and  
 60 Ade, with AbA<sup>200</sup> and X- $\alpha$ -Gal.

61



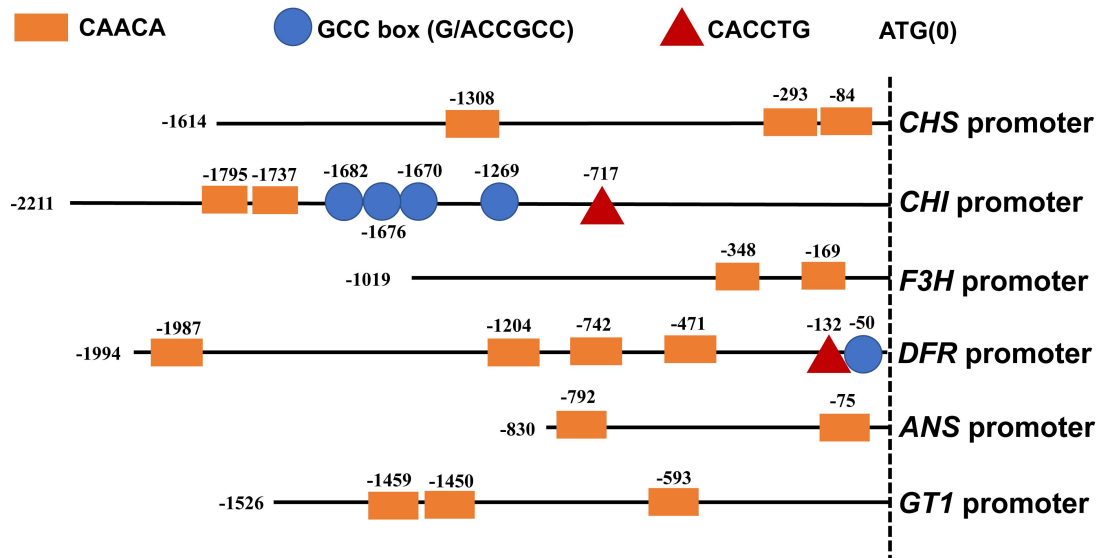

62

63 **Supplemental Figure S8.** *Cis* regulatory elements in promoters of anthocyanin  
 64 biosynthetic genes. Putative AP2/ERF binding sites: CAACA motif, GCC box  
 65 (A/GCCGCC), CACCTG motif are indicated in the promoter regions of genes  
 66 encoding the anthocyanidin synthase.

67

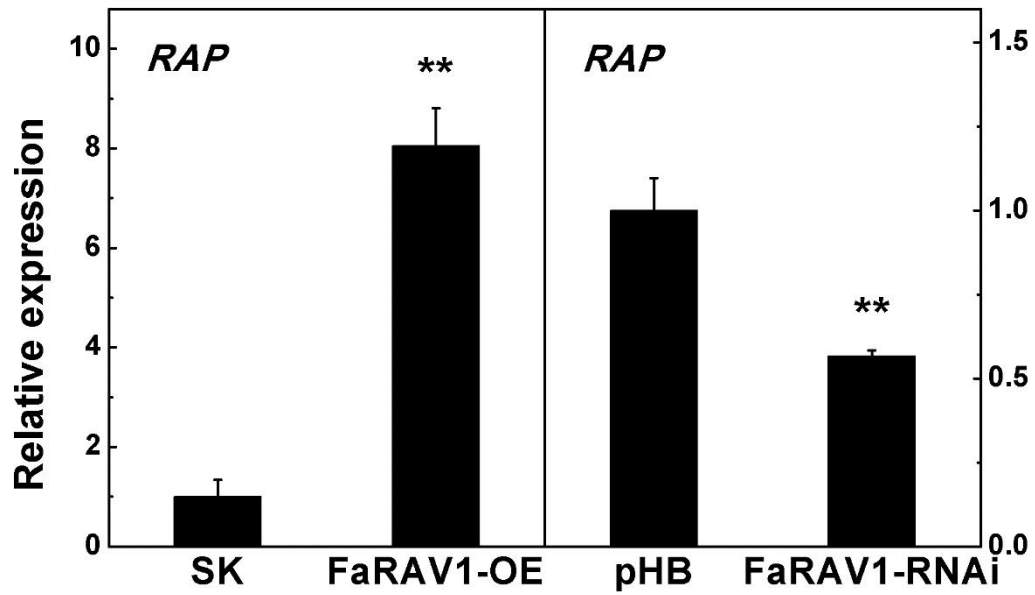

69

70 **Supplemental Figure S9.** Relative expression of *RAP* in *FaRAV1* OE and RNAi fruit  
71 compared with the control fruit. Asterisks denote significant differences using  
72 Student's t test, \*\* $P < 0.01$ .

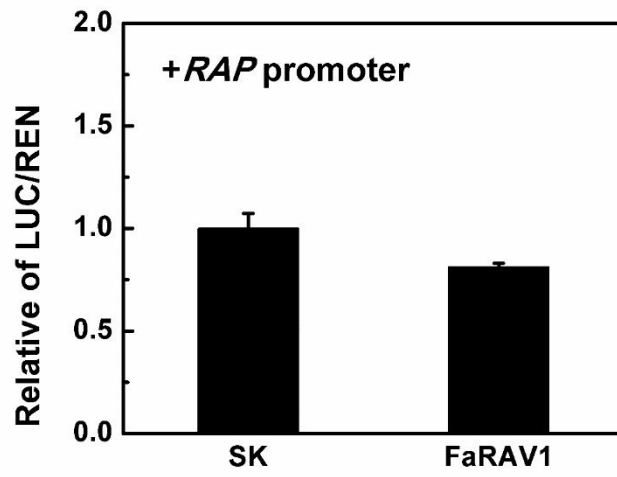

73

74 **Supplemental Figure S10.** Regulatory effect of FaRAV1 on the promoter of *RAP*.

75

76 **Supplemental Table S1. Primers used for reverse transcription quantitative PCR.**

| <b>Gene</b>        | <b>Forward (5'-3')</b>     | <b>Reverse (5'-3')</b>      |
|--------------------|----------------------------|-----------------------------|
| <i>FaRIB413</i>    | ACCGTTGATTGCACAATTGGTCATCG | TACTGCGGGTCGGCAATCGGACG     |
| <i>FaRAV1</i>      | AGAGCGCATTCCAAAGTCAG       | CACAATCCCCTGTTCTTCA         |
| <i>FaMYB10</i>     | AGACGGCTTCATACGCAAAGA      | ATGAAGGTTCTGGTTCGAGG        |
| <i>CHS</i>         | GGCTCACCGTCGAGACCG         | GGAGAAGATCACTCGAATCA        |
| <i>CHI</i>         | GCCGGAAATGGGAAAGTG         | GCTCAGTTTCATGCCTTGAC        |
| <i>F3H</i>         | CCCTAAGGTGGCCTACAACCAAT    | CTTCTTGCAAATCTCAGCGC        |
| <i>DFR</i>         | CACGATTCACGACATTGCGAAATT   | GAACTCAAACCCCATCTCTTTCAGCTT |
| <i>ANS</i>         | GAAGTGCGTACCCAATCCATCGT    | ACCTTCTCCTTGTTGACGAGCCC     |
| <i>GT1</i>         | CCTGGCGCATGGTTCAGT         | CGAGTTCCAACCGCAATGT         |
| <i>RAP</i>         | GCTACTACTGCTCGATCACC       | TGAAGAGACTCGCAAAAGACA       |
| <i>FaRAV1-RNAi</i> | TGGGAGCGGAGATTACATTC       | TGGTGAAATACGAAAGGCTGT       |

78 **Supplemental Table S2. Primers used for vector construction.**

| Primer name              | Sequence (5'-3')                        |
|--------------------------|-----------------------------------------|
| <b>LUC:</b>              |                                         |
| FaMYB10pro-LUC-FP-BamHI  | CAGCCCGGGGATCCAAAAAATGGTACAATTAAG       |
| FaMYB10pro-LUC-RP-NcoI   | TGGCGTCTCCATGGGAAAATTAAGCAGATTTC        |
| CHSpro-LUC-FP-BamHI      | CAGCCCGGGGATCCGAAAATTAATAATGGTGGGGG     |
| CHSpro-LUC-RP-NcoI       | TGGCGTCTCCATGGTTGATTCTCAGAGAAGTG        |
| CHIpro-LUC-FP-BamHI      | CAGCCCGGGGATCCCATTTCCCGGAGAGATG         |
| CHIpro-LUC-RP-NcoI       | TGGCGTCTCCATGGTTGATTTCTTGGTTTTG         |
| F3Hpro-LUC-FP-BamHI      | CAGCCCGGGGATCCGCAATGATTGCCTATAATTA      |
| F3Hpro-LUC-RP-NcoI       | TGGCGTCTCCATGGTCTGATATATGCTCTCTAGC      |
| DFRpro-LUC-FP-BamHI      | CAGCCCGGGGATCCCTTGCCCCAACAAAGGAATT      |
| DFRpro-LUC-RP-NcoI       | TGGCGTCTCCATGGGCCCTAGCTAGTTAGTGCCGT     |
| ANSpro-LUC-FP-BamHI      | CAGCCCGGGGATCCAACTCCGATCCCGAACAAAGT     |
| ANSpro-LUC-RP-NcoI       | TGGCGTCTCCATGGTGTGCGTTCTAGCTATAGCT      |
| GT1pro-LUC-FP-BamHI      | CAGCCCGGGGATCCACATTCTTGTACTGAACTT       |
| GT1pro-LUC-RP-NcoI       | TGGCGTCTCCATGGTTCTAGCTAGTCAAGCTACT      |
| RAPpro-LUC-FP-BamHI      | CAGCCCGGGGATCCAGGAGACTTCGTCGTCGGA       |
| RAPpro-LUC-RP-NcoI       | TGGCGTCTCCATGGTATAGCCACCTGAAAACCTC      |
| <b>pAbAi:</b>            |                                         |
| FaMYB10pro-pAbAi-FP-SacI | AAGCTTGAATTCGAGCTCAAAAAAATGGTACAATTAAG  |
| FaMYB10pro-pAbAi-RP-XhoI | AGCACATGCCTCGAGGAAAATTAAGCAGATTTC       |
| CHSpro-pAbAi-FP-SacI     | AAGCTTGAATTCGAGCTCGAAAATTAATAATGGTGGGGG |
| CHSpro-pAbAi-RP-XhoI     | AGCACATGCCTCGAGTTTGTATTCTCAGAGAAGTG     |
| CHIpro-pAbAi-FP-SacI     | AAGCTTGAATTCGAGCTCCATTTCCCGGAGAGATG     |
| CHIpro-pAbAi-RP-XhoI     | AGCACATGCCTCGAGTTGATTTCTTGGTTTTG        |
| F3Hpro-pAbAi-FP-SacI     | AAGCTTGAATTCGAGCTCGCAATGATTGCCTATAATTA  |
| F3Hpro-pAbAi-RP-XhoI     | AGCACATGCCTCGAGTCTGATATATGCTCTCTAGC     |
| DFRpro-pAbAi-FP-SacI     | AAGCTTGAATTCGAGCTCTTGCCCCAACAAAGGAATT   |

---

|                                   |                                         |
|-----------------------------------|-----------------------------------------|
| DFR <sub>pro</sub> -pAbAi-RP-XhoI | AGCACATGCCTCGAGGCCTAGCTAGTTAGTGCCGT     |
| ANS <sub>pro</sub> -pAbAi-FP-SacI | AAGCTTGAATTCGAGCTCAACTCCGATCCCGAACAAAGT |
| ANS <sub>pro</sub> -pAbAi-RP-XhoI | AGCACATGCCTCGAGTGTCGCTTCTAGCTATAGCT     |
| GT1 <sub>pro</sub> -pAbAi-FP-SacI | AAGCTTGAATTCGAGCTCCACATTCTGTACTGAACTT   |
| GT1 <sub>pro</sub> -pAbAi-RP-XhoI | AGCACATGCCTCGAGTTCTAGCTAGTCAAGCTACT     |

**GFP:**

|                    |                                     |
|--------------------|-------------------------------------|
| FaRAV1-GFP-FP-KpnI | GACGAGCTCGGTACCATGTCGATAGATCTCAGTTC |
| FaRAV1-GFP-RP-SalI | GCTCACCATGTCGACACCACTAATCTGAACACCAA |

**pGADT7:**

|                     |                                      |
|---------------------|--------------------------------------|
| FaRAV1-AD-FP-EcoRI  | GAGGCCAGTGAATTCATGTCGATAGATCTCAGTT   |
| FaRAV1-AD-RP-BamHI  | GAGCTCGATGGATCCCTTAACCACTAATCTGAACAC |
| FaMYB10-AD-FP-EcoRI | GAGGCCAGTGAATTCATGGAGGGTTATTTCCGGT   |
| FaMYB10-AD-RP-BamHI | GAGCTCGATGGATCCCTCATACGTAGGAGATGTTGA |

**pGBKT7:**

|                     |                                      |
|---------------------|--------------------------------------|
| FaRAV1-BD-FP-EcoRI  | ATGGAGGCCGAATTCATGTCGATAGATCTCAGTT   |
| FaRAV1-BD-RP-BamHI  | CAGGTCGACGGATCCCTTAACCACTAATCTGAACAC |
| FaMYB10-BD-FP-EcoRI | ATGGAGGCCGAATTCATGGAGGGTTATTTCCGGT   |
| FaMYB10-BD-RP-BamHI | CAGGTCGACGGATCCCTCATACGTAGGAGATGTTGA |

**SK:**

|                    |                                       |
|--------------------|---------------------------------------|
| FaRAV1-SK-FP-BamHI | TAGAAGTAGTGGATCCATGTCGATAGATCTCAGTT   |
| FaRAV1-SK-RP-EcoRI | GCTTGATATCGAATTCCTTAACCACTAATCTGAACAC |

**PET:**

|                     |                                   |
|---------------------|-----------------------------------|
| FaRAV1-PET-FP-BamHI | GCTGATATCGGATCCATGTCGATAGATCTCAG  |
| FaRAV1-PET-RP-NotI  | TTGTCGACGGCGGCCGACCACTAATCTGAACAC |

**RNAi:**

|                |                                     |
|----------------|-------------------------------------|
| FaRAV1-FP1-pSK | GCTCTCGAGTCTAGAATGTCGATAGATCTCAGTTC |
| FaRAV1-RP1-pSK | CACAAGCTTGACACATTCATACACAATCC       |
| FaRAV1-FP2-pSK | GGTGGATCCATGTCGATAGATCTCAGTTC       |
| FaRAV1-RP2-pSK | CACGAATTCGACACATTCATACACAATCC       |

---

---

**EMSA:**

|                        |                                                       |
|------------------------|-------------------------------------------------------|
| Probe-FP-biotin        | AGGGTGGGGACTCGACAGCAACAAGCTAACTTCCACATGCAATGGATCGAAAT |
| Probe-RP-biotin        | ATTTCGATCCATTGCATGTGGAAGTTAGCTTGTTGCTGTCGAGTCCCCACCCT |
| Probe-FP               | AGGGTGGGGACTCGACAGCAACAAGCTAACTTCCACATGCAATGGATCGAAAT |
| Probe-RP               | ATTTCGATCCATTGCATGTGGAAGTTAGCTTGTTGCTGTCGAGTCCCCACCCT |
| Mutant-Probe-FP-biotin | AGGGTGGGGACTCGACAGTTTTTAGCTAACTTCCACATGCAATGGATCGAAAT |
| Mutant-Probe-RP-biotin | ATTTCGATCCATTGCATGTGGAAGTTAGCTAAAAACTGTCGAGTCCCCACCCT |

---

79 Note: Added restriction enzyme sites are underlined.

80

81 **Supplemental Table S3.** Motifs in the *FaRAVI* promoter identified in silico by  
 82 PlantCARE.

| Elements        | Sequences    | Sites (+) = current strand;<br>(-) = opposite strand | Putative functions                                                          |
|-----------------|--------------|------------------------------------------------------|-----------------------------------------------------------------------------|
| ABRE            | ACGTG        | 1412 (-), 1243 (-)                                   | <i>Cis</i> -acting element involved in the abscisic acid responsiveness     |
| AE-box          | AGAAACAA     | 1504 (+)                                             | Part of a module for light response                                         |
| ARE             | AAACCA       | 1470 (+)                                             | <i>Cis</i> -acting regulatory element essential for the anaerobic induction |
| AT-rich element | ATAGAAATCAA  | 589 (+)                                              | Binding site of AT-rich DNA binding protein (ATBP-1)                        |
| AuxRR-core      | GGTCCAT      | 425 (+)                                              | <i>Cis</i> -acting regulatory element involved in auxin responsiveness      |
| Box 4           | ATTAAT       | 1216 (-)                                             | Part of a conserved DNA module involved in light responsiveness             |
| CAAT-box        | CAAAT, CCAAT | 949 (-), 1743 (+), 247 (+),<br>504 (+)               | Common <i>cis</i> -acting element in promoter and enhancer regions          |
| CAT-box         | GCCACT       | 368 (-)                                              | <i>Cis</i> -acting regulatory element related to meristem expression        |
| CGTCA-motif     | CGTCA        | 1007 (+)                                             | <i>Cis</i> -acting regulatory element involved in the MeJA-responsiveness   |
| G-box           | CACGTC       | 1243 (+), 1412 (+)                                   | <i>Cis</i> -acting regulatory element involved in light responsiveness      |
| I-box           | AAGATAAGGCT  | 1098 (-)                                             | Part of a light responsive element                                          |
| MRE             | AACCTAA      | 1482 (-)                                             | MYB binding site involved in light responsiveness                           |
| P-box           | CCTTTTG      | 782 (+), 1519 (+)                                    | Gibberellin-responsive element                                              |
| TGACG-motif     | TGACG        | 1007 (-)                                             | <i>Cis</i> -acting regulatory element involved in the MeJA-responsiveness   |
